# Supplementary material for: Alginate Self-Crosslinking Ink for 3D Extrusion-Based Cryoprinting and Application for Epirubicin-HCl Delivery on MCF-7 Cells
Source: MDPI journal article supplement (doi:10.3390/molecules27030882), 2022-01-27
Supplement: s1 [file s1]

## Supplementary materials

### Alginate self-crosslinking ink for 3D extrusion-based cryoprinting and application for epirubicin-HCl delivery on MCF-7 cells

Giulia Remaggi, Ovidio Catanzano, Fabiana Quaglia, Lisa Elviri\*

\*Correspondence: lisa.elviri@unipr.it

**Table S1.** SRM transitions with their  $m/z$  values selected for LC-MS/MS analysis. Sequences chosen for semiquantitative evaluation are in bold.

| PROTEIN ID | PROTEIN NAME                                                                 | PEPTIDE SEQUENCE             | PRECURSOR ( $m/z$ ) | PRODUCT ( $m/z$ ) |
|------------|------------------------------------------------------------------------------|------------------------------|---------------------|-------------------|
| P10415     | Apoptosis regulator Bcl-2 ( <b>Bcl-2</b> )                                   | DFAEMSSQLHLTPFTAR            | 975,973             | 1009,430          |
|            |                                                                              | <b>EMSPLVDNIALWMTEYLN</b> R  | <b>1148,061</b>     | <b>1369,682</b>   |
| Q07817     | Bcl-2-like protein 1 ( <b>Bcl-xL</b> )                                       | EMQVLVSR                     | 481,260             | 488,217           |
|            |                                                                              | <b>WFLTGMTVAGVVLLGSLFS</b> R | <b>1077,593</b>     | <b>1218,720</b>   |
| P04637     | Cellular tumor antigen p53 ( <b>p53</b> )                                    | <b>C[+57]SDSDGLAPPQHL</b> R  | <b>833,404</b>      | <b>931,547</b>    |
|            |                                                                              | KPLDGEYFTLQIR                | 790,428             | 803,393           |
|            |                                                                              | QSQHMTEVVR                   | 607,801             | 871,445           |
| Q92934     | Bcl2-associated agonist of cell death ( <b>BAD</b> )                         | MSDEFVDSFK                   | 602,763             | 742,377           |
|            |                                                                              | <b>SAPPNLWAAQR</b>           | <b>605,820</b>      | <b>631,331</b>    |
| P42574     | Caspase-3 ( <b>CASP-3</b> )                                                  | <b>DGSWFIQSLC[+57]AML</b> K  | <b>828,400</b>      | <b>950,480</b>    |
|            |                                                                              | VATEFESFSFDATFHAK            | 967,452             | 998,447           |
| P55211     | Caspase-9 ( <b>CASP-9</b> )                                                  | QLIIDLETR                    | 550,819             | 583,345           |
|            |                                                                              | FSSLHFMVEVK                  | 662,342             | 850,392           |
|            |                                                                              | <b>LSKPTLENLTPVVL</b> RPEIR  | <b>1088,147</b>     | <b>1097,620</b>   |
| Q07812     | Apoptosis regulator BAX ( <b>BAX</b> )                                       | <b>VVALFYFASK</b>            | <b>572,824</b>      | <b>615,314</b>    |
|            |                                                                              | MGGEAPELALDPVPQDASTK         | 1013,494            | 446,170           |
| Q9C0C7     | Activating molecule in BECN1-regulated autophagy protein 1 ( <b>AMBRA1</b> ) | SLGGPLSSHPSR                 | 597,815             | 315,166           |
|            |                                                                              | <b>LMAEGGMTAVVQR</b>         | <b>681,847</b>      | <b>862,380</b>    |
